# Supplementary material for: A hierarchical architecture S/MWCNT nanomicrosphere with large pores for lithium sulfur batteries
Source: Royal Society of Chemistry journal article supplement (doi:10.1039/c2cp40141j), 2012-01-01
Supplement: c2cp40141j.pdf [file c2cp40141j.pdf]

# Electronic Supplementary Information

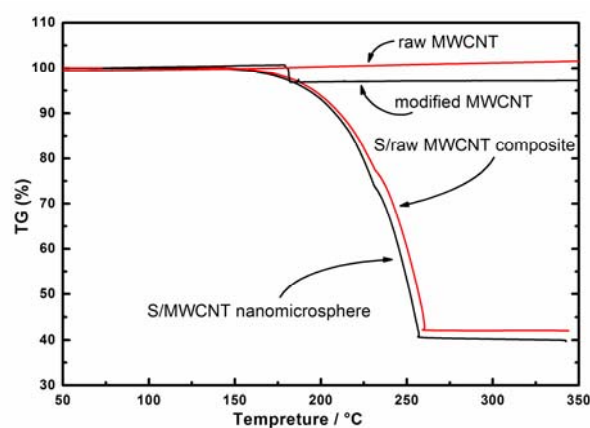

S1. TGA was carried out under nitrogen using a Pyris Diamond TG/DTA analyzer (Perkin Elmer) operated at a heating rate of 5 °C min<sup>-1</sup>.

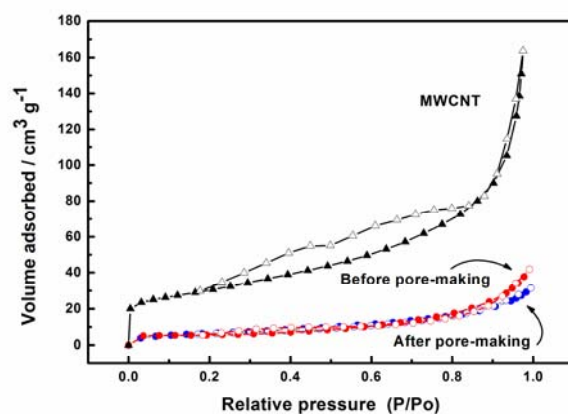

S2. The BET specific surface areas were calculated by Nitrogen adsorption-desorption isotherms at 77 K. The  $S_{BET}$  of S/MWCNT nanomicrosphere before and after pore-making by ball-milling process were 18.290 m<sup>2</sup> g<sup>-1</sup> and 23.622 m<sup>2</sup> g<sup>-1</sup> respectively. The  $S_{BET}$  of MWNT was 107.3 m<sup>2</sup> g<sup>-1</sup>.
